# Supplementary material for: Dynamic Trend of Myocardial Edema in Takotsubo Syndrome: A Serial Cardiac Magnetic Resonance Study
Source: MDPI journal article supplement (doi:10.3390/jcm11040987), 2022-02-14
Supplement: s1 [file s1]

**Table S1. Serial findings of laboratory and electrocardiographic data.**

|                 | Acute              | Subacute         | Chronic          | P value |
|-----------------|--------------------|------------------|------------------|---------|
| Laboratory data |                    |                  |                  |         |
| WBC (/μl)       | 10000 (6100-12300) | 5600 (4000-7400) | 6500 (5250-7700) | <0.01   |
| CRP (mg/dl)     | 0.22 (0.04-0.73)   | 0.11 (0.02-0.79) | 0.04 (0.02-0.12) | 0.06    |
| BNP (pg/ml)     | 328 (155-500)      | 104 (68-140)     | 45 (30-59)       | 0.09    |
| ECG findings    |                    |                  |                  |         |
| HR (bpm)        | 72 ± 13            | 64 ± 10          | 69 ± 11          | 0.01    |
| QTc (msec)      | 504 ± 72           | 442 ± 32         | 426 ± 24         | 0.01    |

BNP = brain natriuretic peptide; CRP = C-reactive protein; ECG = electrocardiography; HR = heart rate; QTc = corrected QT interval; WBC = white blood cell count.
